# Supplementary material for: Complementation testing identifies genes mediating effects at quantitative trait loci underlying fear-related behavior
Source: PubMed Central journal article supplement — Cell Genom. 2024 May 1;4(5):100545. doi: 10.1016/j.xgen.2024.100545 (PMC11099346; doi:10.1016/j.xgen.2024.100545), 2024-05-01
Supplement: mmc1.pdf [file mmc1.pdf]

**Cell Genomics, Volume 4**

**Supplemental information**

**Complementation testing identifies genes**

**mediating effects at quantitative trait loci**

**underlying fear-related behavior**

**Patrick B. Chen, Rachel Chen, Nathan LaPierre, Zeyuan Chen, Joel Mefford, Emilie Marcus, Matthew G. Heffel, Daniela C. Soto, Jason Ernst, Chongyuan Luo, and Jonathan Flint**

## Supplemental Tables

| Study ID         | Name of measure in original data | EPM-open | FC-context | FC-cue | Source       | Used | Sample size | Reference        |
|------------------|----------------------------------|----------|------------|--------|--------------|------|-------------|------------------|
| Brown1           | open_ent_EPM                     | 1        |            |        | JAX          | YES  | 328         | 1                |
| Flaherty1        | EPM_open                         | 1        |            |        | JAX          | YES  | 318         | 2                |
| Milner-2008      | EPM-open                         | 1        |            |        | Literature   | YES  | 112         | 3                |
| Schalkwyk1       | entry_open_EPM                   | 1        |            |        | JAX          | YES  | 86          | 4                |
| Shin1            | EPM_open                         | 1        |            |        | JAX          | YES  | 123         | 5                |
| UCLA-2023        | EPM-open                         | 1        |            |        | UCLA         | YES  | 333         | This publication |
| Wahlsten1        | EPM_open                         | 1        |            |        | JAX          | YES  | 325         | 6-7              |
| Brigman-2009     | EPM-open                         | 1        |            |        | Gene Network |      | 123         | 8                |
| Brown1           | open_ent_EZM                     | 1        |            |        | JAX          |      | 380         | 1                |
| Carhuatanta-2014 | EPM-open                         | 1        |            |        | Gene Network |      | 307         | 9                |
| Philip-2010      | EPM-open                         | 1        |            |        | Gene Network |      | 617         | 10               |
| Yang-2008        | EPM-open                         | 1        |            |        | Literature   |      | 142         | 11               |
| Brigman-2009     | FC-context                       |          | 1          |        | Gene Network | YES  | 111         | 3                |
| Carhuatanta-2014 | FC-context                       |          | 1          |        | Gene Network | YES  | 282         | 9                |
| Owen-1997        | FC-context                       |          | 1          |        | Literature   | YES  | 300         | 12               |
| UCLA-2023        | FC-context                       |          | 1          |        | UCLA         | YES  | 332         | This publication |
| Yang-2008        | FC-context                       |          | 1          |        | Literature   | YES  | 150         | 11               |
| Bolivar2         | act_context_mean                 |          | 1          |        | JAX          |      | 289         | 13               |
| Bothe-2005       | FC-context                       |          | 1          |        | Literature   |      | 500         | 14               |
| Knoll-2016       | FC-context                       |          | 1          |        | Literature   |      | 721         | 15               |
| Palmer1          | freezing to context              |          | 1          |        | JAX          |      | 462         | 16               |
| Palmer3          | freezing to context              |          | 1          |        | JAX          |      | 319         | 17               |
| Shin1            | FC_memory                        |          | 1          |        | JAX          |      | 362         | 5                |
| Smith-2011       | ctx_imob                         |          | 1          |        | JAX          |      | 669         | 18               |
| Brigman-2009     | FC-cue                           |          |            | 1      | Gene Network | YES  | 116         | 8                |
| Carhuatanta-2014 | FC-cue                           |          |            | 1      | Gene Network | YES  | 301         | 9                |
| Knoll-2016       | FC-cue                           |          |            | 1      | Literature   | YES  | 708         | 4                |
| Owen-1997        | FC-cue                           |          |            | 1      | Literature   | YES  | 300         | 12               |
| Smith-2011       | cue_imob                         |          |            | 1      | JAX          | YES  | 669         | 18               |
| UCLA-2023        | FC-cue                           |          |            | 1      | UCLA         | YES  | 332         | This publication |
| Yang-2008        | FC-cue                           |          |            | 1      | Literature   | YES  | 150         | 11               |
| Bolivar2         | act_cued_mean                    |          |            | 1      | JAX          |      | 289         | 13               |
| Bothe-2005       | FC-cue                           |          |            | 1      | Literature   |      | 500         | 14               |
| Palmer1          | freezing to tones                |          |            | 1      | JAX          |      | 462         | 16               |
| Palmer3          | freezing to tones                |          |            | 1      | JAX          |      | 319         | 17               |

**Supplemental Table S2: Data identified from the published literature and websites for use in the meta-analysis for mapping fear related behavior, related to Figure 1.** For the meta-analysis, this gives study ID, phenotype name used in the study, phenotype to which it was assigned in the meta-analysis (where EPM means elevated plus maze and FC means fear conditioning), source of the data, whether the data were included into the meta-analysis, and number of animals and a reference to the original publication.

| <i>trait</i> | <i>chr</i> | <i>start</i> | <i>end</i>  | <i>max pos</i> | <i>size</i> | <i>logp</i> | <i>n. of genes</i> | <i>selected</i> |
|--------------|------------|--------------|-------------|----------------|-------------|-------------|--------------------|-----------------|
| EPM-open     | 1          | 8,051,126    | 12,843,641  | 12822766       | 4.79        | 5.38        | 23                 | NO              |
| EPM-open     | 1          | 81,170,369   | 90,915,537  | 90906140       | 9.75        | 4.71        | 114                | NO              |
| EPM-open     | 1          | 107,003,663  | 107,107,513 | 107039384      | 0.10        | 5.44        | 2                  | NO              |
| EPM-open     | 1          | 134,517,231  | 142,991,595 | 142876925      | 8.47        | 5.17        | 67                 | NO              |
| EPM-open     | 1          | 157,544,700  | 159,401,857 | 158161029      | 1.86        | 7.82        | 10                 | NO              |
| EPM-open     | 2          | 86,964,644   | 87,228,108  | 87226901       | 0.26        | 9.73        | 13                 | NO              |
| EPM-open     | 2          | 99,960,104   | 104,091,211 | 100845037      | 4.13        | 5.28        | 30                 | NO              |
| EPM-open     | 2          | 114,378,383  | 117,549,383 | 114639431      | 3.17        | 7.64        | 15                 | NO              |
| EPM-open     | 2          | 130,308,391  | 132,695,042 | 132656944      | 2.39        | 6.73        | 54                 | NO              |
| EPM-open     | 2          | 178,967,969  | 181,729,773 | 178969014      | 2.76        | 5.07        | 71                 | NO              |
| EPM-open     | 3          | 10,977,446   | 11,422,508  | 11421316       | 0.45        | 5.61        | 0                  | NO              |
| EPM-open     | 3          | 38,981,096   | 45,775,379  | 38995330       | 6.79        | 6.23        | 22                 | NO              |
| EPM-open     | 3          | 57,159,935   | 62,350,184  | 62350182       | 5.19        | 8.30        | 40                 | NO              |
| EPM-open     | 3          | 105,097,575  | 112,000,682 | 111438974      | 6.90        | 5.03        | 87                 | NO              |
| EPM-open     | 3          | 123,188,658  | 123,396,053 | 123276372      | 0.21        | 6.12        | 3                  | NO              |
| EPM-open     | 3          | 145,929,813  | 150,609,181 | 148545481      | 4.68        | 4.51        | 22                 | NO              |
| EPM-open     | 4          | 33,005,779   | 40,497,077  | 33095253       | 7.49        | 4.64        | 41                 | NO              |
| EPM-open     | 4          | 57,671,803   | 62,857,853  | 57671910       | 5.19        | 4.73        | 62                 | NO              |
| EPM-open     | 4          | 76,119,560   | 85,680,047  | 76447340       | 9.56        | 6.13        | 24                 | NO              |
| EPM-open     | 4          | 115,165,660  | 121,522,914 | 117736252      | 6.36        | 5.49        | 149                | NO              |
| EPM-open     | 4          | 137,887,832  | 145,481,723 | 138501861      | 7.59        | 6.37        | 143                | NO              |
| EPM-open     | 4          | 155,544,804  | 156,238,419 | 155968187      | 0.69        | 4.55        | 48                 | NO              |
| EPM-open     | 5          | 54,144,189   | 54,263,530  | 54234453       | 0.12        | 13.15       | 0                  | YES             |
| EPM-open     | 5          | 108,100,558  | 110,251,292 | 108100635      | 2.15        | 10.25       | 47                 | NO              |
| EPM-open     | 5          | 126,174,260  | 126,355,761 | 126192582      | 0.18        | 8.67        | 0                  | NO              |
| EPM-open     | 5          | 144,223,539  | 144,987,290 | 144233030      | 0.76        | 4.98        | 11                 | YES             |
| EPM-open     | 6          | 22,443,939   | 25,909,081  | 23092121       | 3.47        | 11.37       | 21                 | NO              |
| EPM-open     | 6          | 88,721,203   | 98,441,406  | 92702629       | 9.72        | 5.54        | 84                 | NO              |
| EPM-open     | 6          | 115,361,899  | 116,527,763 | 116527093      | 1.17        | 11.10       | 25                 | NO              |
| EPM-open     | 6          | 140,493,700  | 148,611,826 | 148609800      | 8.12        | 5.19        | 74                 | NO              |
| EPM-open     | 7          | 26,633,267   | 32,815,915  | 32807189       | 6.18        | 6.78        | 199                | NO              |
| EPM-open     | 7          | 92,714,690   | 100,590,709 | 99781176       | 7.88        | 4.81        | 78                 | NO              |
| EPM-open     | 8          | 47,424,796   | 49,191,404  | 49189891       | 1.77        | 5.45        | 12                 | NO              |
| EPM-open     | 8          | 117,219,229  | 117,238,740 | 117238740      | 0.02        | 7.91        | 0                  | NO              |
| EPM-open     | 9          | 37,046,757   | 42,684,188  | 41699149       | 5.64        | 5.50        | 143                | NO              |
| EPM-open     | 9          | 59,269,502   | 60,576,659  | 60415574       | 1.31        | 5.04        | 18                 | NO              |
| EPM-open     | 10         | 3,982,409    | 7,993,140   | 7460347        | 4.01        | 6.37        | 31                 | NO              |
| EPM-open     | 10         | 62,407,026   | 68,117,393  | 66257850       | 5.71        | 4.97        | 44                 | NO              |
| EPM-open     | 10         | 87,467,449   | 87,595,552  | 87595101       | 0.13        | 5.12        | 2                  | NO              |
| EPM-open     | 10         | 99,702,519   | 100,643,112 | 100180799      | 0.94        | 9.25        | 10                 | NO              |
| EPM-open     | 10         | 115,061,969  | 116,129,037 | 116101513      | 1.07        | 6.47        | 11                 | NO              |

|            |    |             |             |           |      |       |     |     |
|------------|----|-------------|-------------|-----------|------|-------|-----|-----|
| EPM-open   | 10 | 127,597,093 | 128,207,380 | 128207149 | 0.61 | 7.15  | 26  | NO  |
| EPM-open   | 11 | 31,617,205  | 33,045,751  | 31650378  | 1.43 | 6.48  | 23  | NO  |
| EPM-open   | 11 | 73,152,512  | 78,258,400  | 74973330  | 5.11 | 4.75  | 140 | NO  |
| EPM-open   | 11 | 92,514,551  | 102,328,161 | 96517839  | 9.81 | 4.95  | 329 | NO  |
| EPM-open   | 12 | 10,903,674  | 12,325,756  | 12280611  | 1.42 | 10.29 | 12  | NO  |
| EPM-open   | 12 | 24,801,558  | 24,941,020  | 24940968  | 0.14 | 6.21  | 2   | NO  |
| EPM-open   | 12 | 72,397,728  | 80,142,472  | 79653619  | 7.75 | 4.76  | 71  | NO  |
| EPM-open   | 12 | 91,547,374  | 98,556,066  | 91724133  | 7.01 | 4.60  | 12  | NO  |
| EPM-open   | 12 | 108,589,687 | 116,579,257 | 113828296 | 7.99 | 9.45  | 176 | NO  |
| EPM-open   | 13 | 64,041,193  | 64,320,793  | 64314535  | 0.28 | 7.15  | 7   | NO  |
| EPM-open   | 13 | 96,546,053  | 106,493,266 | 96581488  | 9.95 | 5.45  | 83  | NO  |
| EPM-open   | 14 | 76,541,966  | 77,890,188  | 76807687  | 1.35 | 5.42  | 9   | NO  |
| EPM-open   | 14 | 120,012,537 | 122,241,245 | 121836360 | 2.23 | 4.76  | 18  | NO  |
| EPM-open   | 15 | 4,581,923   | 5,987,339   | 5910696   | 1.41 | 11.75 | 10  | NO  |
| EPM-open   | 15 | 58,665,949  | 59,903,946  | 59903856  | 1.24 | 11.96 | 13  | NO  |
| EPM-open   | 15 | 71,640,419  | 71,928,936  | 71799081  | 0.29 | 5.59  | 2   | NO  |
| EPM-open   | 15 | 95,805,247  | 96,231,856  | 96231261  | 0.43 | 8.20  | 6   | NO  |
| EPM-open   | 16 | 6,116,010   | 8,344,551   | 8160532   | 2.23 | 5.49  | 1   | NO  |
| EPM-open   | 16 | 41,370,396  | 41,397,117  | 41370402  | 0.03 | 9.48  | 1   | YES |
| EPM-open   | 16 | 51,739,855  | 57,287,996  | 53176660  | 5.55 | 12.38 | 26  | NO  |
| EPM-open   | 17 | 17,525,875  | 18,122,485  | 18119717  | 0.60 | 10.79 | 12  | NO  |
| EPM-open   | 17 | 35,025,170  | 42,556,420  | 37885007  | 7.53 | 7.52  | 197 | NO  |
| EPM-open   | 17 | 71,861,284  | 80,410,865  | 73349005  | 8.55 | 5.49  | 59  | NO  |
| EPM-open   | 17 | 90,988,935  | 91,039,920  | 91039814  | 0.05 | 6.63  | 1   | NO  |
| EPM-open   | 18 | 19,237,701  | 19,467,138  | 19303086  | 0.23 | 6.69  | 0   | NO  |
| EPM-open   | 18 | 34,269,862  | 34,328,458  | 34323952  | 0.06 | 4.71  | 1   | NO  |
| EPM-open   | 18 | 45,056,349  | 54,799,081  | 52676655  | 9.74 | 5.11  | 52  | NO  |
| EPM-open   | 18 | 65,182,153  | 65,755,343  | 65182284  | 0.57 | 5.85  | 8   | NO  |
| EPM-open   | 18 | 75,473,013  | 76,395,866  | 76223188  | 0.92 | 8.47  | 6   | NO  |
| EPM-open   | 19 | 10,791,445  | 16,546,950  | 14581483  | 5.76 | 5.26  | 127 | NO  |
| EPM-open   | 19 | 46,663,249  | 47,371,106  | 46664076  | 0.71 | 11.33 | 16  | NO  |
| FC-context | 2  | 125,868,001 | 129,363,717 | 128363526 | 3.50 | 5.13  | 61  | NO  |
| FC-context | 2  | 131,054,562 | 132,419,076 | 131419005 | 1.36 | 5.46  | 24  | NO  |
| FC-context | 4  | 54,968,565  | 58,974,284  | 55968578  | 4.01 | 6.56  | 28  | NO  |
| FC-context | 4  | 63,558,947  | 65,303,376  | 64099832  | 1.74 | 6.14  | 9   | NO  |
| FC-context | 4  | 70,154,809  | 78,177,088  | 73444653  | 8.02 | 7.39  | 25  | YES |
| FC-context | 4  | 78,766,185  | 85,257,786  | 84257660  | 6.49 | 8.23  | 21  | YES |
| FC-context | 5  | 111,026,691 | 113,811,974 | 112810193 | 2.79 | 5.43  | 39  | NO  |
| FC-context | 10 | 92,603,234  | 94,876,655  | 93603389  | 2.27 | 6.03  | 31  | NO  |
| FC-context | 10 | 102,470,556 | 105,577,476 | 105191184 | 3.11 | 5.99  | 12  | NO  |
| FC-context | 11 | 113,211,188 | 113,375,870 | 113360130 | 0.16 | 5.54  | 1   | NO  |
| FC-context | 13 | 79,653,177  | 84,780,850  | 80662886  | 5.13 | 7.07  | 17  | NO  |
| FC-context | 13 | 88,050,130  | 92,556,190  | 89050599  | 4.51 | 5.97  | 13  | NO  |

|            |    |             |             |           |       |       |     |     |
|------------|----|-------------|-------------|-----------|-------|-------|-----|-----|
| FC-context | 15 | 3,062,020   | 6,754,143   | 5753680   | 3.69  | 6.34  | 26  | NO  |
| FC-context | 16 | 69,443,083  | 73,061,157  | 72061114  | 3.62  | 5.67  | 9   | NO  |
| FC-cue     | 2  | 157,505,101 | 159,522,386 | 158521915 | 2.02  | 5.96  | 26  | NO  |
| FC-cue     | 7  | 81,429,834  | 101,030,310 | 89412852  | 19.60 | 12.88 | 186 | NO  |
| FC-cue     | 7  | 125,083,067 | 127,084,850 | 126084800 | 2.00  | 5.07  | 57  | NO  |
| FC-cue     | 9  | 106,693,528 | 108,694,995 | 107693870 | 2.00  | 5.89  | 77  | NO  |
| FC-cue     | 10 | 13,700,072  | 15,703,556  | 14700119  | 2.00  | 5.16  | 8   | NO  |
| FC-cue     | 11 | 3,370,877   | 9,544,314   | 8532018   | 6.17  | 5.5   | 100 | NO  |
| FC-cue     | 13 | 78,196,122  | 82,295,567  | 81923446  | 4.10  | 8.22  | 10  | NO  |
| FC-cue     | 13 | 82,924,324  | 89,583,537  | 88583892  | 6.66  | 7.06  | 14  | NO  |
| FC-cue     | 13 | 92,130,558  | 95,554,450  | 93126201  | 3.42  | 7.46  | 35  | NO  |
| FC-cue     | 13 | 116,386,705 | 118,387,377 | 117819025 | 2.00  | 7.57  | 7   | YES |
| FC-cue     | 14 | 40,646,127  | 43,530,172  | 41646248  | 2.88  | 5.39  | 37  | NO  |
| FC-cue     | 14 | 61,757,581  | 64,255,785  | 62757647  | 2.50  | 5.31  | 40  | NO  |
| FC-cue     | 14 | 71,846,334  | 72,909,269  | 72846442  | 1.06  | 6.21  | 4   | NO  |
| FC-cue     | 16 | 26,422,169  | 28,281,084  | 27304476  | 1.86  | 6.71  | 10  | NO  |
| FC-cue     | 19 | 32,762,251  | 35,307,221  | 34269128  | 2.54  | 5.44  | 30  | NO  |

**Supplemental Table S3: Quantitative trait loci for fear-related behavior, related to Figure 1.** The table shows the traits mapped (EPM-open: entries into the open arms of the elevated plus maze, FC-context: freezing to the context in a fear conditioning experiment; FC-cue: freezing to the cue in a fear conditioning experiment); *chr*: chromosome; *start*: start of empirically defined 95% confidence interval of the locus; *end*: end of the 95% confidence interval; *max pos*: position of the marker that gave the maximum negative logarithm (base 10) of the association P-value at the locus; *size* : length of the QTL; *logp*: value of the maximum negative logarithm (base 10) of the association P-value; *n. of genes*: number of genes in the interval; *selected*: whether or not this interval was chosen for testing by quantitative complementation

| Gene          | Description  | Sequence 5'-3'          | Product (bp) |
|---------------|--------------|-------------------------|--------------|
| Megf9         | Megf9-M-F    | GGTCAGGCTCTGAGGGTAGA    | Mu: 206      |
|               | Megf9-M-R    | GGAATCCGTTCCAATGAACA    | (WT: 817)    |
|               | Megf9-W-F    | CACAGGGCAGTGTGATTGTC    | WT: 474      |
| Emb           | Emb W-F      | CTCCCTCTGCTGGCTCTTTA    | WT: 384      |
|               | Emb M-R      | TCGAAACTGTCATCCAGTGC    | Mu: 246      |
|               | Emb W-R      | ATGGACATTTTTCCACGTC     |              |
| Hcn1          | Hcn1-M-F     | ATTTGGATCAAAGGCAAACA    | Mu: 240      |
|               | Hcn1-M-R     | CAGTTGGCTCAAATGATTCAGA  | (WT: 1167)   |
|               | Hcn1-W-F     | AAAGCTGGTTTGTGGTGGAC    | WT: 377      |
| Ptprd         | Ptprd-M-F    | GGGTTGGGCACTGAGAAGTA    | Mu: 229      |
|               | Ptprd-M-R    | R TTTTGACATCCATTTCCAAGG | (WT: 673)    |
|               | Ptprd-W-R    | R TCTCCAAAAGTCCCCAAATG  | WT: 475      |
| Lsamp         | Lsamp-M-F    | GCCCTCTCAGAAATGTCACG    | Mu: 176      |
|               | Lsamp-M-R    | TCACCAGCACATGGAGTTTC    | WT: 539      |
| Nptx2         | Nptx2-M-F    | GAAGCCAGTTTCCTTTCT      | Mu: 190      |
|               | Nptx2-M-R-2  | GGAGGCCATCACAGTAAGGT    | (WT: 976)    |
|               | Nptx2-W-R    | GCTGACCTGTGTGCTCACTT    | WT: 403      |
| Stim2         | Stim2-M-F    | ATGGGATCCCTTCTCTCTGG    | Mu: 233      |
|               | Stim2-M-R    | CAACTTCACCTTCCGGCTAC    | (Wt: 1486)   |
|               | Stim2-W-R    | TGAGATGCCTCGGTTACCTC    | Wt: 490      |
| Mrps30        | Mrps30 WT-F  | TTCCATTGGTGGCTTAGAAAA   |              |
|               | Mrps30 Mut-R | GCCATCATGAACAACATGG     | Mu: 219      |
|               | Mrps30 WT-R  | AGGAATGCGTTCTTCACCAC    | WT: 442      |
| Parp8         | Parp8 WT-F   | CACCGAATCTCCAAAATGG     |              |
|               | Parp8 Mut-R  | TTTACAATTTTCCAGGCTCCA   | Mu: 246      |
|               | Parp8 WT-R   | CGTGGTGATCCAGCTAACAG    | WT: 396      |
| Psip1         | Psip1 WT-F   | GGGAAGATGGGAGACAGACA    |              |
|               | Psip1 Mut-R  | CCAGTCCAGGTATGGCATT     | Mu: 218      |
|               | Psip1 WT-R   | TGTCACATCCCCTTAAATTTG   | WT: 422      |
| Sh3gl2        | Sh3gl2 WT-F  | TGGAGGAGAAACCTGTCACTG   |              |
|               | Sh3gl2 Mut-R | ATGTGGCACCAAGCCTTAC     | Mu: 250      |
|               | Sh3gl2 WT-R  | CTTACCTGGATTGGGTTGGA    | WT: 397      |
| Snapc3        | Snapc3 WT-F  | GGGATGGCTCAGTGGTTAGA    | Mu: 215      |
|               | Snapc3 Mut-R | GGAACAGGGTGGTAGACAGG    |              |
| Ttc39b        | Ttc39b WT-F  | GGTGAATGAAACGGAGCAGT    |              |
|               | Ttc39b Mut-R | TTTGCTGGAGAGCATTCTTTT   | Mu: 237      |
|               | Ttc 39b WT-R | GCCCTTTCTGTCCAGGAACT    | WT: 392      |
| 4933413L06Rik | Rik-KI-F     | GTCACAAGGGCACATGTTCCACT | Mu: 556      |
|               | Rik-KI-R     | CCCCCACTGCTCACCAC       | WT: 434      |

**Supplemental Table S4: Genotyping primers for mouse knock outs, related to STAR Methods.** The table gives the sequence of primers used to genotype the CRISPR-engineered mouse knockouts, providing the names of the target genes, forward and reverse primers, and the sizes of the amplification products (Mu: knockout ; WT: wildtype).

| Target Gene   | Description     | Sequence 5'-3'          | Tm    | Product Size (bp) | Target Exons | Deleted Exon in knock out |
|---------------|-----------------|-------------------------|-------|-------------------|--------------|---------------------------|
| Ptpd          | Ptpd-23-24-25-F | GCACTTTATAAGAATGGATCGAG | 57.15 | 198               | 23-24-25     | #22                       |
|               | Ptpd-23-24-25-R | AATGAAGCAGCCAGTTCTGC    | 60.55 |                   |              |                           |
| Megf9         | Megf9-4-5-F     | CGTGTTCGCGAGTGAAGTCT    | 61.45 | 105               | 4-5          | #2                        |
|               | Megf9-4-5-R     | TATTGCAGTTCTGGCCTGTG    | 59.86 |                   |              |                           |
| Lsamp         | Lsamp-3-4-F     | ATGAGGGCAGCAATGTAACC    | 59    | 168               | 3-4          | #2                        |
|               | Lsamp-3-4-R     | GGCAGCCTTGCACTCATATT    | 60    |                   |              |                           |
| Stim2         | Stim2-9-10-F    | TCCTCCCTGGACGAAGTAGA    | 59    | 226               | 9-10         | #6-#7                     |
|               | Stim2-9-10-R    | CAGCAATAGGGTAGGGTGA     | 60    |                   |              |                           |
| Nptx2         | Nptx2-2-3-F     | CGGAGCTGGAAGATGAGAAG    | 60    | 229               | 2-3          | #1                        |
|               | Nptx2-2-3-R     | AGGCAGATGGTAAAGGCGTA    | 59    |                   |              |                           |
| Hcn1          | Hcn1-4-5-F      | GCCACAGCTTTGATCCAGTC    | 60.81 | 159               | 4-5          | #2                        |
|               | Hcn1-4-5-R      | ATCGAAGATCTTGCCTTGGT    | 58.74 |                   |              |                           |
| Psip1         | Psip1-4-5-F     | GCAAACCAAATAAACGGAAAGGT | 58.63 | 196               | 4-5          | #3                        |
|               | Psip1-4-5-R     | GTCACATCCTCATTGCTGGC    | 59.26 |                   |              |                           |
| Emb           | Emb-6-7-F       | GAATGAGCTGGTTGTGCTGA    | 59.99 | 211               | 6-7          | #5                        |
|               | Emb-6-7-R       | GTACCGGGGGACATTGTTTT    | 60.84 |                   |              |                           |
| Parp8         | Parp8-24-25 F   | GACGAGCCAGCTTCCAGTAG    | 60.16 | 164               | 24-25        | #20,21,22                 |
|               | Parp8-24-25 R   | TTCGGGACAACCCATATCTC    | 59.75 |                   |              |                           |
| Mrps30        | Mrps 30-4-5 F   | CCATTGTTTCAGACGGCAGTA   | 59.72 | 200               | 3-4          | #2                        |
|               | Mrps 30-4-5 R   | GCTCCAGTCCAAGCAAAAAG    | 59.99 |                   |              |                           |
| Ttc39b        | Ttc39b-3-4-F    | TTGTACCATGCGAGACCAAA    | 60.11 | 124               | 3-4          | #2                        |
|               | Ttc39b-3-4-R    | TTCAGTGCCTCTGCACACTC    | 60.19 |                   |              |                           |
| Sh3gl2        | Sh3gl2-4-5-F    | CAGAGGCCATGCTCAAGTTC    | 60.94 | 157               | 4-5          | #3                        |
|               | Sh3gl2-4-5-R    | AGATTCTGAAGGGGGTCGAT    | 59.9  |                   |              |                           |
| Snapc3        | Snapc3-4-5-F    | CCTGAAAACCCAGCAGACAT    | 60.11 | 192               | 4-5          | #3                        |
|               | Snapc3-4-5-R    | GAATTCTCCACCGATCTGGA    | 60.01 |                   |              |                           |
| 4933413L06Rik | RIK(5)-4-F-1    | CAGCCTGTTTCCCAGTCATC    | 60.6  | 192               | 4            | #1                        |
|               | RIK(5)-4-R-1    | AATGCTCTTTGGTGGCATT     | 59.5  |                   |              |                           |

**Supplemental Table S5: qPCR primers used to determine expression of the CRISPR targeted genes, related to STAR Methods.** The table gives the sequence of primers used in the quantitative PCR testing of the knock-out animals, providing the names of the target genes, forward and reverse primers, the melting temperature (Tm), the product size, the exons amplified and the exon that is deleted in the CRISPR engineered mouse line.

| RNA             | Hippocampus |       |             | Amygdala        |           |       |             |
|-----------------|-------------|-------|-------------|-----------------|-----------|-------|-------------|
|                 | Cell type   | total | significant | pct             | Cell type | total | significant |
| Exc-CA1-Camk2d  | 18015       | 587   | 3.258       | Exc-Abi3bp      | 18785     | 473   | 2.518       |
| Exc-CA1-Fras1   | 18152       | 1149  | 6.330       | Exc-Ebf2        | 13090     | 111   | 0.848       |
| Exc-CA1-Galnt16 | 19739       | 1993  | 10.097      | Exc-Strip2      | 5714      | 7     | 0.123       |
| Exc-CA3         | 19562       | 1511  | 7.724       | Exc-Tafa1       | 19527     | 940   | 4.814       |
| Exc-Cdh12       | 13249       | 155   | 1.170       | Exc-Tfap2c      | 8494      | 19    | 0.224       |
| Exc-DG          | 20271       | 2236  | 11.031      | Exc-Vwa5b1      | 19592     | 767   | 3.915       |
| Exc-ENT         | 18376       | 1123  | 6.111       | Inh-Drd2        | 13046     | 35    | 0.268       |
| Exc-Gpc6        | 15946       | 526   | 3.299       | Inh-Htr3a       | 14074     | 126   | 0.895       |
| Inh-CGE         | 16845       | 399   | 2.369       | Inh-Lamp5       | 12786     | 74    | 0.579       |
| Inh-Lamp5       | 14426       | 229   | 1.587       | Inh-Lypd6b      | 12946     | 78    | 0.603       |
| Inh-MGE         | 17820       | 365   | 2.048       | Inh-Nxph2       | 19945     | 164   | 0.822       |
| NN-Astro        | 18340       | 466   | 2.541       | Inh-Sst         | 18321     | 340   | 1.856       |
| NN-MGC          | 13338       | 164   | 1.230       | Inh-Tshz1       | 17989     | 28    | 0.156       |
| NN-ODC          | 15986       | 601   | 3.760       | Inh-Zfhx3       | 18812     | 107   | 0.569       |
| NN-OPC          | 15579       | 384   | 2.465       | NN-Astro        | 19206     | 570   | 2.968       |
| NN-VLMC         | 11062       | 63    | 0.570       | NN-Endo_SMCPeri | 5506      | 6     | 0.109       |
| CR-CR           | 11082       | 45    | 0.406       | NN-Endo_VLMC    | 4373      | 86    | 1.967       |
|                 |             |       |             | NN-MGC          | 13709     | 188   | 1.371       |
|                 |             |       |             | NN-ODC          | 14315     | 348   | 2.431       |
|                 |             |       |             | NN-OPC          | 16216     | 364   | 2.245       |
|                 |             |       |             | NN-VLMC         | 8814      | 18    | 0.204       |

| ATAC            | Hippocampus |       |             | Amygdala   |           |       |             |
|-----------------|-------------|-------|-------------|------------|-----------|-------|-------------|
|                 | Cell type   | total | significant | pct        | Cell type | total | significant |
| Exc-CA1-Camk2d  | 274444      | 1176  | 0.429       | Exc-Abi3bp | 244313    | 325   | 0.133       |
| Exc-CA1-Fras1   | 268808      | 1242  | 0.462       | Exc-Ebf2   | 197530    | 52    | 0.026       |
| Exc-CA1-Galnt16 | 277994      | 3637  | 1.308       | Exc-Strip2 | 143706    | 9     | 0.006       |
| Exc-CA3         | 277897      | 3296  | 1.186       | Exc-Tafa1  | 251656    | 2755  | 1.095       |
| Exc-Cdh12       | 162588      | 32    | 0.020       | Exc-Tfap2c | 82406     | 8     | 0.010       |
| Exc-DG          | 277754      | 4282  | 1.542       | Exc-Vwa5b1 | 248416    | 918   | 0.370       |
| Exc-ENT         | 261482      | 690   | 0.264       | Inh-Drd2   | 141913    | 22    | 0.016       |
| Exc-Gpc6        | 230447      | 888   | 0.385       | Inh-Htr3a  | 121437    | 19    | 0.016       |
| Inh-CGE         | 218934      | 95    | 0.043       | Inh-Lamp5  | 111249    | 23    | 0.021       |
| Inh-Lamp5       | 158758      | 40    | 0.025       | Inh-Lypd6b | 100583    | 8     | 0.008       |
| Inh-MGE         | 254528      | 32    | 0.013       | Inh-Nxph2  | 246554    | 424   | 0.172       |
| NN-Astro        | 51716       | 3     | 0.006       | Inh-Sst    | 206133    | 85    | 0.041       |
| NN-MGC          | 55630       | 9     | 0.016       | Inh-Tshz1  | 243662    | 393   | 0.161       |
| NN-ODC          | 38625       | 2     | 0.005       | Inh-Zfhx3  | 242906    | 474   | 0.195       |
| NN-OPC          | 47529       | 3     | 0.006       | NN-Astro   | 48911     | 3     | 0.006       |
|                 |             |       |             | NN-MGC     | 46732     | 5     | 0.011       |
|                 |             |       |             | NN-ODC     | 28016     | 2     | 0.007       |

| Methylation | Hippocampus     |          |          | Amygdala |            |         |          |       |
|-------------|-----------------|----------|----------|----------|------------|---------|----------|-------|
|             | Cell type       | total    | mutation | pct      | Cell type  | total   | mutation | pct   |
|             | Exc-CA1-Camk2d  | 591460   | 1051     | 0.178    | Exc-Abi3bp | 822415  | 547      | 0.067 |
|             | Exc-CA1-Fras1   | 1012284  | 1737     | 0.172    | Exc-Ebf2   | 2418    | 0        | 0.000 |
|             | Exc-CA1-Galnt16 | 6761056  | 26464    | 0.391    | Exc-Strip2 | 2267    | 0        | 0.000 |
|             | Exc-CA3         | 3255884  | 9203     | 0.283    | Exc-Tafa1  | 1.2E+07 | 46504    | 0.380 |
|             | Exc-Cdh12       | 7485     | 110      | 1.470    | Exc-Tfap2c | 280     | 3        | 1.071 |
|             | Exc-DG          | 14759665 | 81752    | 0.554    | Exc-Vwa5b1 | 5264608 | 12172    | 0.231 |
|             | Exc-ENT         | 739955   | 1176     | 0.159    | Inh-Drd2   | 3085    | 0        | 0.000 |
|             | Exc-Gpc6        | 200918   | 484      | 0.241    | Inh-Htr3a  | 8419    | 1        | 0.012 |
|             | Inh-CGE         | 15833    | 40       | 0.253    | Inh-Lamp5  | 4167    | 0        | 0.000 |
|             | Inh-Lamp5       | 12629    | 20       | 0.158    | Inh-Lypd6b | 5250    | 1        | 0.019 |
|             | Inh-MGE         | 754092   | 578      | 0.077    | Inh-Nxph2  | 3860176 | 7128     | 0.185 |
|             | NN-Astro        | 5141     | 30       | 0.584    | Inh-Sst    | 267290  | 205      | 0.077 |
|             | NN-EC           | 436      | 3        | 0.688    | Inh-Tshz1  | 1021024 | 1466     | 0.144 |
|             | NN-MGC          | 93803    | 366      | 0.390    | Inh-Zfhx3  | 1189382 | 1879     | 0.158 |
|             | NN-ODC          | 1620528  | 1073     | 0.066    | NN-Astro   | 91417   | 104      | 0.114 |
|             | NN-OPC          | 29065    | 166      | 0.571    | NN-MGC     | 17552   | 17       | 0.097 |
|             | NN-VLMC         | 954      | 8        | 0.839    | NN-ODC     | 71576   | 96       | 0.134 |
|             |                 |          |          |          | NN-OPC     | 16264   | 52       | 0.320 |
|             |                 |          |          |          | NN-VLMC    | 1232    | 8        | 0.649 |

**Supplemental Table S7: The number of RNA species and ATAC sites that differed significantly between C57BL/6J and DBA/2J, and the number of methylation sites containing mutations that removed the methylated site, related to Figure 6.** Significant differences were determined by exceeding an adjusted  $p$  value below a 5% FDR cutoff value, the default from the output of DESeq2). Data for each cell type is shown below for the two brain regions (hippocampus and amygdala), with counts of the significant species, and percentages of the total.

| Modality    | Class      | Hippocampus | Amygdala |
|-------------|------------|-------------|----------|
| RNA         | Excitatory | 6.47        | 2.72     |
|             | Inhibitory | 2.02        | 0.74     |
| ATAC        | Excitatory | 0.75        | 0.35     |
|             | Inhibitory | 0.03        | 0.10     |
| Methylation | Excitatory | 0.45        | 0.32     |
|             | Inhibitory | 0.08        | 0.17     |

**Supplemental Table S8: The weighted means of significant strain differences, expressed as a percentage, for the excitatory and inhibitory classes of cell type in the hippocampus and amygdala, related to Figure 6.** Results are means of the excitatory and inhibitory cell types from Supplemental Table S7, weighted by the number of observations, showing that there appear to be more excitatory than inhibitory variable species. All differences are highly significant by Fisher's exact test P-values  $P < 2e-16$ .

| <b>Modality</b> | <b>Tissue</b> | <b>Deviance</b> | <b>P-value</b> |
|-----------------|---------------|-----------------|----------------|
| RNA             | Hippocampus   | 1291.6          | <2.2e-16       |
|                 | Amygdala      | 1282.2          | <2.2e-16       |
| ATAC            | Hippocampus   | 12895.3         | <2.2e-16       |
|                 | Amygdala      | 8771.2          | <2.2e-16       |
| Methyl          | Hippocampus   | 28295.7         | <2.2e-16       |
|                 | Amygdala      | 517.86          | <2.2e-16       |

**Supplemental Table S9: Cell type contributes to the number of significant differences, related to Figure 6.** The relative contribution of sequence coverage and cell type was assessed by comparing the fit of two models. In one model we used a single predictor, sequence coverage, for the number of significant species. In the second model we added cell type as a predictor. The improvement in fit was tested using ANOVA. Results are highly significant, as shown by the deviance and associated P-values in the table.

| Modality | Tissue      | Predictor         | Estimate  | z-value | P-value  |
|----------|-------------|-------------------|-----------|---------|----------|
| RNA      | Hippocampus | Sequence coverage | 6.15E-05  | 30.80   | <2e-16   |
|          |             | Class             | -8.27E-01 | -28.11  | <2e-16   |
|          | Amygdala    | Sequence coverage | 6.72E-06  | 5.10    | 3.48E-07 |
|          |             | Class             | -3.99E-01 | -13.46  | <2e-16   |
| ATAC     | Hippocampus | Sequence coverage | 3.64E-04  | 30.91   | <2e-16   |
|          |             | Class             | -2.20E+00 | -50.03  | <2e-16   |
|          | Amygdala    | Sequence coverage | 1.65E-04  | 6.92    | 4.53E-12 |
|          |             | Class             | -9.51E-01 | -35.44  | <2e-16   |
| Methyl   | Hippocampus | Sequence coverage | 1.08E-01  | 102.61  | <2e-16   |
|          |             | Class             | -9.06E-01 | -31.96  | <2e-16   |
|          | Amygdala    | Sequence coverage | 8.39E-02  | 56.54   | <2e-16   |
|          |             | Class             | -6.29E-01 | -61.35  | <2e-16   |

**Supplemental Table S10: Results from a generalized linear model (the glm function in R), testing whether sequence coverage and class (“Inhibitory” or “Excitatory”) predict whether RNA or ATAC sites were significant, and whether methylation sites were mutant or not (in each case coding outcomes as 1 or 0), related to Figure 6.** The effect of class is relative to “Excitatory” and the direction for each modality is the same (negative, meaning that prediction is positive for “Excitatory”), and highly significant. Similar results were obtained using negative binomial distribution. P-values were well calibrated, as shown by creating an empirical distribution by randomly selecting the same number of transcripts as in the observed data for each cell type from the total set of transcripts in all cell types, while ensuring that a gene was selected only once for each cell type. Analysing the empirical data in the same way as the real data, using the generalized linear model to test whether sequence coverage and class (“Inhibitory” or “Excitatory”) predicted the strain differences, confirmed that the P-values we obtained for the real data were significantly different from the empirical null distribution ( $P < 0.0001$  in all cases).

| Modality    | Tissue      | Level      | Predictor      | Estimate | Est. Error | Lower 95% CI | Upper 95% CI |
|-------------|-------------|------------|----------------|----------|------------|--------------|--------------|
| RNA         | HIPPOCAMPUS | Group      | Class          | 0.68     | 0.56       | 0.02         | 2.09         |
|             |             |            | Class:celltype | 0.52     | 0.15       | 0.32         | 0.89         |
|             |             | Population | Coverage       | 0.50     | 0.01       | 0.49         | 0.51         |
| RNA         | AMYGDALA    | Group      | Class          | 0.85     | 0.79       | 0.02         | 2.85         |
|             |             |            | Class:celltype | 1.10     | 0.25       | 0.73         | 1.68         |
|             |             | Population | Coverage       | 0.38     | 0.01       | 0.36         | 0.39         |
| ATAC        | HIPPOCAMPUS | Group      | Class          | 2.54     | 1.31       | 0.73         | 5.81         |
|             |             |            | Class:celltype | 1.26     | 0.41       | 0.69         | 2.27         |
|             |             | Population | Coverage       | 0.60     | 0.02       | 0.56         | 0.63         |
| ATAC        | AMYGDALA    | Group      | Class          | 1.33     | 1.45       | 0.04         | 5.19         |
|             |             |            | Class:celltype | 0.42     | 0.32       | 0.02         | 1.23         |
|             |             | Population | Coverage       | 0.70     | 0.14       | 0.44         | 0.97         |
| Methylation | HIPPOCAMPUS | Group      | Class          | 1.37     | 1.37       | 0.04         | 4.87         |
|             |             |            | Class:celltype | 0.95     | 0.47       | 0.36         | 2.13         |
|             |             | Population | Coverage       | 2.12     | 0.31       | 1.52         | 2.74         |
| Methylation | AMYGDALA    | Group      | Class          | 0.86     | 0.79       | 0.04         | 3.07         |
|             |             |            | Class:celltype | 0.49     | 0.33       | 0.13         | 1.39         |
|             |             | Population | Coverage       | 2.45     | 0.44       | 1.62         | 3.30         |

**Supplemental table S11: Contribution of cell type to the number of significant differences between excitatory and inhibitory neurons, related to Figure 6.** The table shows the results of testing whether the number of strain differences are significantly different between the two cell type classes (excitatory and inhibitory) while considering the coverage difference and accounting for the different numbers of cell types in each class. Results are from a Bayesian model using the *brms* package<sup>19</sup> with a negative binomial distribution for the number of significant differences (for RNA and ATAC data) or the number of mutations (for methylation data). The model includes predictors for sequence *Coverage* and *Class* of cell type (italicized words refer to the terms in the table). Results are given for the two tissues (hippocampus and amygdala) and three epigenetic modalities (RNA, methylation and ATAC), reporting standard deviations for group-level effects (class and cell type nested within class) and estimates for population-level effects (sequence coverage). The two-sided 95% credible intervals (lower and upper 95% confidence interval (CI) based on quantiles are given. Results are from eight chains, each of 2,000 iterations of which the first 1,000 are warmup to calibrate the NUTS sampler. To reduce divergent transitions, *adapt\_delta* was set to 0.95. Chain convergence was 1, as estimated from the potential scale reduction factor on split chains ( $R_{hat} = 1$ ). Results show that the estimate for class for each tissue and each modality has confidence intervals that do not overlap zero and therefore can be regarded as significant.

| Strain   | Cell type    | Total      | Mutant sites | Percentage |
|----------|--------------|------------|--------------|------------|
| A/J      | Excitatory   | 13,085,362 | 1,285,640    | 9.83       |
|          | Inhibitory   | 2,700,028  | 53,309       | 1.97       |
|          | Non-neuronal | 1,435,768  | 23,415       | 1.63       |
| C57BL/6J | Excitatory   | 12,639,259 | 758,120      | 6          |
|          | Inhibitory   | 944,284    | 14,485       | 1.53       |
|          | Non-neuronal | 989,433    | 16,513       | 1.67       |
| BALB/cJ  | Excitatory   | 12,388,844 | 1,213,199    | 9.79       |
|          | Inhibitory   | 2,811,830  | 59,446       | 2.11       |
|          | Non-neuronal | 1,807,105  | 29,817       | 1.65       |
| DBA/2J   | Excitatory   | 12,424,446 | 1,013,242    | 8.16       |
|          | Inhibitory   | 1,232,573  | 20,534       | 1.67       |
|          | Non-neuronal | 2,267,190  | 37,280       | 1.64       |
| FVB/J    | Excitatory   | 12,494,856 | 682,230      | 5.46       |
|          | Inhibitory   | 349,790    | 8,262        | 2.36       |
|          | Non-neuronal | 979,704    | 16,955       | 1.73       |
| PWK/PhJ  | Excitatory   | 13,766,132 | 985,463      | 7.16       |
|          | Inhibitory   | 983,129    | 15,771       | 1.6        |
|          | Non-neuronal | 270,084    | 9,609        | 3.56       |
| WSB/EiJ  | Excitatory   | 12,046,029 | 1,257,213    | 10.44      |
|          | Inhibitory   | 2,654,718  | 58,372       | 2.2        |
|          | Non-neuronal | 2,382,166  | 41,153       | 1.73       |

**Supplemental Table S12: Proportion of variant methylation sites in multiple strain comparison, related to Figure 6.** Results from seven strain comparisons are shown (column 1), each time with CAST/EiJ as the outgroup, for excitatory neurons, inhibitory neurons and non-neuronal cell types. The total number of methylated sites is given for each strain comparison ('Total') in each cell type. The column headed 'mutant sites' lists the number of sites fully methylated in one strain but ablated in the other due to the presence of a mutation. The column headed 'pct' gives the percentage of mutant sites.

## REFERENCES

1. O'Leary, T.P., Gunn, R.K., and Brown, R.E. (2013). What are we measuring when we test strain differences in anxiety in mice? *Behav Genet* *43*, 34-50.
2. Cook, M.N., Williams, R.W., and Flaherty, L. (2001). Anxiety-related behaviors in the elevated zero-maze are affected by genetic factors and retinal degeneration. *Behav Neurosci* *115*, 468-476.
3. Milner, L.C., and Crabbe, J.C. (2008). Three murine anxiety models: results from multiple inbred strain comparisons. *Genes Brain Behav* *7*, 496-505.
4. Lad, H.V., Liu, L., Paya-Cano, J.L., Parsons, M.J., Kember, R., Fernandes, C., and Schalkwyk, L.C. (2010). Behavioural battery testing: evaluation and behavioural outcomes in 8 inbred mouse strains. *Physiol Behav* *99*, 301-316.
5. Keum, S., Park, J., Kim, A., Park, J., Kim, K.K., Jeong, J., and Shin, H.S. (2016). Variability in empathic fear response among 11 inbred strains of mice. *Genes Brain Behav* *15*, 231-242.
6. Wahlsten, D., Metten, P., and Crabbe, J.C. (2003). Survey of 21 inbred mouse strains in two laboratories reveals that BTBR T/+ tf/tf has severely reduced hippocampal commissure and absent corpus callosum. *Brain Res* *971*, 47-54.
7. Wahlsten, D., Bachmanov, A., Finn, D.A., and Crabbe, J.C. (2006). Stability of inbred mouse strain differences in behavior and brain size between laboratories and across decades. *Proc Natl Acad Sci U S A* *103*, 16364-16369.
8. Brigman, J.L., Mathur, P., Lu, L., Williams, R.W., and Holmes, A. (2009). Genetic relationship between anxiety-related and fear-related behaviors in BXD recombinant inbred mice. *Behav Pharmacol* *20*, 204-209.
9. Carhuatanta, K.A., Shea, C.J., Herman, J.P., and Jankord, R. (2014). Unique genetic loci identified for emotional behavior in control and chronic stress conditions. *Front Behav Neurosci* *8*, 341.
10. Philip, V.M., Duvvuru, S., Gomero, B., Ansah, T.A., Blaha, C.D., Cook, M.N., Hamre, K.M., Lariviere, W.R., Matthews, D.B., Mittleman, G., *et al.* (2010). High-throughput behavioral phenotyping in the expanded panel of BXD recombinant inbred strains. *Genes Brain Behav* *9*, 129-159.
11. Yang, R.J., Mozhui, K., Karlsson, R.M., Cameron, H.A., Williams, R.W., and Holmes, A. (2008). Variation in mouse basolateral amygdala volume is associated with differences in stress reactivity and fear learning. *Neuropsychopharmacology* *33*, 2595-2604.
12. Owen, E.H., Christensen, S.C., Paylor, R., and Wehner, J.M. (1997). Identification of quantitative trait loci involved in contextual and auditory-cued fear conditioning in BXD recombinant inbred strains. *Behavioral Neuroscience* *111*, 292-300.
13. Bolivar, V.J., Pooler, O., and Flaherty, L. (2001). Inbred strain variation in contextual and cued fear conditioning behavior. *Mamm Genome* *12*, 651-656.
14. Bothe, G.W.M., Bolivar, V., Vedder, M.J., and Geistfeld, J.G. (2005). Behavioral differences among fourteen inbred mouse strains commonly used as disease models. *Comparative Medicine* *55*, 326-334.
15. Knoll, A.T., Halladay, L.R., Holmes, A.J., and Levitt, P. (2016). Quantitative Trait Loci and a Novel Genetic Candidate for Fear Learning. *J Neurosci* *36*, 6258-6268.
16. Ponder, C.A., Munoz, M., Gilliam, T.C., and Palmer, A.A. (2007). Genetic architecture of fear conditioning in chromosome substitution strains: relationship to measures of innate (unlearned) anxiety-like behavior. *Mamm Genome* *18*, 221-228.

17. Sittig, L.J., Carbonetto, P., Engel, K.A., Krauss, K.S., Barrios-Camacho, C.M., and Palmer, A.A. (2016). Genetic Background Limits Generalizability of Genotype-Phenotype Relationships. *Neuron* 91, 1253-1259.
18. Park, C.C., Gale, G.D., de Jong, S., Ghazalpour, A., Bennett, B.J., Farber, C.R., Langfelder, P., Lin, A., Khan, A.H., Eskin, E., *et al.* (2011). Gene networks associated with conditional fear in mice identified using a systems genetics approach. *BMC Syst Biol* 5, 43.
19. Bürkner, P.C. (2017). brms: An R Package for Bayesian Multilevel Models Using Stan. *Journal of Statistical Software* 80, 1-28.
